# Supplementary material for: Cost-effectiveness analysis of COVID-19 mRNA XBB.1.5 Fall 2023 vaccination in the Netherlands
Source: bioRxiv or medRxiv preprint supplement (doi:10.1101/2024.09.26.24314420), 2024-09-27
Supplement: Supplementary file [file media-1.pdf]

## Supplementary Material

Supplemental materials to:

*Cost-effectiveness analysis of COVID-19 mRNA XBB.1.5 Fall 2023 vaccination in the Netherlands*

### Methods

#### **Calculation of unvaccinated hospitalization risk**

The hospitalization risk for the unvaccinated population was calculated based on data before the initial COVID-19 vaccine rollout during the pandemic, corrected for the delta and omicron variants of the virus. In the table below, this can be calculated as:  $a \times b \times c$ .

| Age group   | Risk COVID hospitalization <sup>1</sup><br><i>a</i> | Relative risk pre-delta vs. delta variant (95% CI) <sup>2</sup><br><i>b</i> | Relative risk omicron vs. delta variant <sup>3</sup><br><i>c</i> | Calculated risk hospitalization unvaccinated |
|-------------|-----------------------------------------------------|-----------------------------------------------------------------------------|------------------------------------------------------------------|----------------------------------------------|
| 20-29 years | 0.14%                                               | 1.93 (1.84 – 2.03)                                                          | 0.43 (0.37 – 0.49)                                               | 0.12%                                        |
| 30-39 years | 0.59%                                               |                                                                             | 0.31 (0.28 – 0.35)                                               | 0.35%                                        |
| 40-49 years | 1.00%                                               |                                                                             | 0.20 (0.17 – 0.23)                                               | 0.39%                                        |
| 50-59 years | 2.50%                                               |                                                                             | 0.14 (0.12 – 0.17)                                               | 0.68%                                        |
| 60-69 years | 7.20%                                               |                                                                             | 0.14 (0.12 – 0.16)                                               | 1.95%                                        |
| 70-79 years | 10.0%                                               |                                                                             | 0.20 (0.17 – 0.24)                                               | 3.86%                                        |
| 80+ years   | 32.0%                                               |                                                                             | 0.33 (0.28 – 0.39)                                               | 20.38%                                       |

#### **Calculation of risk of infection**

The risk of infection was calculated using the hospitalization risk for the unvaccinated (see above), the number of hospitalization in the period September 2022 to July 2023<sup>4</sup>, the vaccination coverage in both the general population and the hospitalized population<sup>5</sup>, and statistics on the size of the general population<sup>6</sup>.

The results are displayed on the following page.

|                 | Hospitalizations | Vaccination coverage | Unvaccinated hospitalizations <sup>2</sup> | Calculated risk of hospitalization <sup>1</sup> | Backcalculated number of cases <sup>2</sup> | Unvaccinated population <sup>2</sup> | Risk of COVID-19 infection <sup>1,2</sup> |
|-----------------|------------------|----------------------|--------------------------------------------|-------------------------------------------------|---------------------------------------------|--------------------------------------|-------------------------------------------|
| <b>January</b>  |                  |                      |                                            |                                                 |                                             |                                      |                                           |
| 20-29 years     | 25               | 10%                  | 22                                         | 0.12%                                           | 19,366                                      | 2,233,707                            | 0.87% (0.60% - 1.25%)                     |
| 30-39 years     | 49               | 10%                  | 44                                         | 0.35%                                           | 12,493                                      | 2,171,853                            | 0.58% (0.39% - 0.82%)                     |
| 40-49 years     | 60               | 17%                  | 50                                         | 0.39%                                           | 12,902                                      | 2,157,398                            | 0.60% (0.43% - 0.82%)                     |
| 50-59 years     | 161              | 17%                  | 134                                        | 0.68%                                           | 19,782                                      | 2,440,051                            | 0.81% (0.60% - 1.09%)                     |
| 60-64 years     | 130              | 42%                  | 75                                         | 1.95%                                           | 3,876                                       | 639,365                              | 0.61% (0.43% - 0.83%)                     |
| 65-69 years     | 219              | 42%                  | 127                                        | 1.95%                                           | 6,529                                       | 564,123                              | 1.16% (0.83% - 1.59%)                     |
| 70-79 years     | 670              | 42%                  | 389                                        | 3.86%                                           | 10,067                                      | 523,291                              | 1.92% (1.30% - 2.91%)                     |
| 80+ years       | 898              | 53%                  | 422                                        | 20.38%                                          | 2,071                                       | 275,081                              | 0.75% (0.35% - 1.77%)                     |
| <b>February</b> |                  |                      |                                            |                                                 |                                             |                                      |                                           |
| 20-29 years     | 40               | 1%                   | 40                                         | 0.12%                                           | 34,083                                      | 2,233,707                            | 1.53% (1.06% - 2.19%)                     |
| 30-39 years     | 62               | 1%                   | 61                                         | 0.35%                                           | 17,388                                      | 2,171,853                            | 0.80% (0.54% - 1.15%)                     |
| 40-49 years     | 91               | 25%                  | 68                                         | 0.39%                                           | 17,681                                      | 2,157,398                            | 0.82% (0.60% - 1.14%)                     |
| 50-59 years     | 173              | 25%                  | 130                                        | 0.68%                                           | 19,208                                      | 2,440,051                            | 0.79% (0.59% - 1.07%)                     |
| 60-64 years     | 167              | 48%                  | 87                                         | 1.95%                                           | 4,464                                       | 639,365                              | 0.70% (0.50% - 0.96%)                     |
| 65-69 years     | 244              | 48%                  | 127                                        | 1.95%                                           | 6,522                                       | 564,123                              | 1.16% (0.83% - 1.59%)                     |
| 70-79 years     | 814              | 48%                  | 423                                        | 3.86%                                           | 10,966                                      | 523,291                              | 2.10% (1.42% - 3.17%)                     |
| 80+ years       | 1084             | 57%                  | 466                                        | 20.38%                                          | 2,287                                       | 275,081                              | 0.83% (0.38% - 1.95%)                     |
| <b>March</b>    |                  |                      |                                            |                                                 |                                             |                                      |                                           |
| 20-29 years     | 36               | 13%                  | 31                                         | 0.12%                                           | 26,957                                      | 2,233,707                            | 1.21% (0.84% - 1.73%)                     |
| 30-39 years     | 67               | 13%                  | 58                                         | 0.35%                                           | 16,513                                      | 2,171,853                            | 0.76% (0.50% - 1.07%)                     |
| 40-49 years     | 86               | 27%                  | 63                                         | 0.39%                                           | 16,264                                      | 2,157,398                            | 0.75% (0.54% - 1.02%)                     |
| 50-59 years     | 208              | 27%                  | 152                                        | 0.68%                                           | 22,478                                      | 2,440,051                            | 0.92% (0.68% - 1.23%)                     |
| 60-64 years     | 216              | 47%                  | 114                                        | 1.95%                                           | 5,885                                       | 639,365                              | 0.92% (0.66% - 1.27%)                     |
| 65-69 years     | 295              | 47%                  | 156                                        | 1.95%                                           | 8,037                                       | 564,123                              | 1.42% (1.03% - 1.97%)                     |
| 70-79 years     | 1015             | 47%                  | 538                                        | 3.86%                                           | 13,937                                      | 523,291                              | 2.66% (1.81% - 4.04%)                     |
| 80+ years       | 1330             | 58%                  | 559                                        | 20.38%                                          | 2,741                                       | 275,081                              | 1.00% (0.46% - 2.34%)                     |
| <b>April</b>    |                  |                      |                                            |                                                 |                                             |                                      |                                           |
| 20-29 years     | 15               | 15%                  | 13                                         | 0.12%                                           | 10,974                                      | 2,233,707                            | 0.49% (0.34% - 0.71%)                     |
| 30-39 years     | 23               | 15%                  | 20                                         | 0.35%                                           | 5,538                                       | 2,171,853                            | 0.26% (0.17% - 0.36%)                     |
| 40-49 years     | 31               | 24%                  | 24                                         | 0.39%                                           | 6,104                                       | 2,157,398                            | 0.28% (0.20% - 0.39%)                     |
| 50-59 years     | 72               | 24%                  | 55                                         | 0.68%                                           | 8,101                                       | 2,440,051                            | 0.33% (0.24% - 0.45%)                     |
| 60-64 years     | 71               | 51%                  | 35                                         | 1.95%                                           | 1,788                                       | 639,365                              | 0.28% (0.20% - 0.38%)                     |
| 65-69 years     | 138              | 51%                  | 68                                         | 1.95%                                           | 3,476                                       | 564,123                              | 0.62% (0.44% - 0.84%)                     |

|               | Hospitalizations | Vaccination coverage | Unvaccinated hospitalizations <sup>2</sup> | Calculated risk of hospitalization <sup>1</sup> | Backcalculated number of cases <sup>2</sup> | Unvaccinated population <sup>2</sup> | Risk of COVID-19 infection <sup>1,2</sup> |
|---------------|------------------|----------------------|--------------------------------------------|-------------------------------------------------|---------------------------------------------|--------------------------------------|-------------------------------------------|
| 70-79 years   | 435              | 51%                  | 213                                        | 3.86%                                           | 5,522                                       | 523,291                              | 1.06% (0.72% - 1.60%)                     |
| 80+ years     | 611              | 62%                  | 232                                        | 20.38%                                          | 1,139                                       | 275,081                              | 0.41% (0.19% - 0.97%)                     |
| <b>May</b>    |                  |                      |                                            |                                                 |                                             |                                      |                                           |
| 20-29 years   | 6                | 14%                  | 5                                          | 0.12%                                           | 4,441                                       | 2,233,707                            | 0.20% (0.14% - 0.29%)                     |
| 30-39 years   | 15               | 14%                  | 13                                         | 0.35%                                           | 3,654                                       | 2,171,853                            | 0.17% (0.11% - 0.24%)                     |
| 40-49 years   | 14               | 23%                  | 11                                         | 0.39%                                           | 2,793                                       | 2,157,398                            | 0.13% (0.09% - 0.18%)                     |
| 50-59 years   | 39               | 23%                  | 30                                         | 0.68%                                           | 4,446                                       | 2,440,051                            | 0.18% (0.13% - 0.24%)                     |
| 60-64 years   | 56               | 51%                  | 27                                         | 1.95%                                           | 1,410                                       | 639,365                              | 0.22% (0.16% - 0.30%)                     |
| 65-69 years   | 57               | 51%                  | 28                                         | 1.95%                                           | 1,436                                       | 564,123                              | 0.25% (0.18% - 0.35%)                     |
| 70-79 years   | 220              | 51%                  | 108                                        | 3.86%                                           | 2,793                                       | 523,291                              | 0.53% (0.36% - 0.81%)                     |
| 80+ years     | 265              | 59%                  | 109                                        | 20.38%                                          | 533                                         | 275,081                              | 0.19% (0.09% - 0.46%)                     |
| <b>June</b>   |                  |                      |                                            |                                                 |                                             |                                      |                                           |
| 20-29 years   | 2                | 0%                   | 2                                          | 0.12%                                           | 1,721                                       | 2,233,707                            | 0.08% (0.05% - 0.10%)                     |
| 30-39 years   | 6                | 0%                   | 6                                          | 0.35%                                           | 1,700                                       | 2,171,853                            | 0.08% (0.05% - 0.10%)                     |
| 40-49 years   | 4                | 32%                  | 3                                          | 0.39%                                           | 705                                         | 2,157,398                            | 0.03% (0.03% - 0.05%)                     |
| 50-59 years   | 17               | 32%                  | 12                                         | 0.68%                                           | 1,711                                       | 2,440,051                            | 0.07% (0.06% - 0.11%)                     |
| 60-64 years   | 15               | 58%                  | 6                                          | 1.95%                                           | 324                                         | 639,365                              | 0.05% (0.04% - 0.08%)                     |
| 65-69 years   | 26               | 58%                  | 11                                         | 1.95%                                           | 561                                         | 564,123                              | 0.10% (0.08% - 0.16%)                     |
| 70-79 years   | 52               | 58%                  | 22                                         | 3.86%                                           | 566                                         | 523,291                              | 0.11% (0.08% - 0.18%)                     |
| 80+ years     | 74               | 65%                  | 26                                         | 20.38%                                          | 127                                         | 275,081                              | 0.05% (0.02% - 0.13%)                     |
| <b>July</b>   |                  |                      |                                            |                                                 |                                             |                                      |                                           |
| 20-29 years   | 3                | 25%                  | 2                                          | 0.12%                                           | 1,937                                       | 2,233,707                            | 0.09% (0.05% - 0.10%)                     |
| 30-39 years   | 6                | 25%                  | 4                                          | 0.35%                                           | 1,275                                       | 2,171,853                            | 0.06% (0.02% - 0.05%)                     |
| 40-49 years   | 4                | 33%                  | 3                                          | 0.39%                                           | 694                                         | 2,157,398                            | 0.03% (0.00% - 0.00%)                     |
| 50-59 years   | 18               | 33%                  | 12                                         | 0.68%                                           | 1,785                                       | 2,440,051                            | 0.07% (0.03% - 0.05%)                     |
| 60-64 years   | 12               | 57%                  | 5                                          | 1.95%                                           | 265                                         | 639,365                              | 0.04% (0.02% - 0.03%)                     |
| 65-69 years   | 21               | 57%                  | 9                                          | 1.95%                                           | 464                                         | 564,123                              | 0.08% (0.04% - 0.07%)                     |
| 70-79 years   | 78               | 57%                  | 34                                         | 3.86%                                           | 869                                         | 523,291                              | 0.17% (0.07% - 0.15%)                     |
| 80+ years     | 90               | 80%                  | 18                                         | 20.38%                                          | 88                                          | 275,081                              | 0.03% (0.02% - 0.09%)                     |
| <b>August</b> |                  |                      |                                            |                                                 |                                             |                                      |                                           |
| 20-29 years   | 8                | 21%                  | 6                                          | 0.12%                                           | 5,440                                       | 2,233,707                            | 0.24% (NA - NA)                           |
| 30-39 years   | 8                | 21%                  | 6                                          | 0.35%                                           | 1,790                                       | 2,171,853                            | 0.08% (NA - NA)                           |
| 40-49 years   | 12               | 34%                  | 8                                          | 0.39%                                           | 2,052                                       | 2,157,398                            | 0.10% (NA - NA)                           |
| 50-59 years   | 23               | 34%                  | 15                                         | 0.68%                                           | 2,247                                       | 2,440,051                            | 0.09% (NA - NA)                           |

|                 | Hospitalizations | Vaccination coverage | Unvaccinated hospitalizations <sup>2</sup> | Calculated risk of hospitalization <sup>1</sup> | Backcalculated number of cases <sup>2</sup> | Unvaccinated population <sup>2</sup> | Risk of COVID-19 infection <sup>1,2</sup> |
|-----------------|------------------|----------------------|--------------------------------------------|-------------------------------------------------|---------------------------------------------|--------------------------------------|-------------------------------------------|
| 60-64 years     | 16               | 50%                  | 8                                          | 1.95%                                           | 411                                         | 639,365                              | 0.06% (NA - NA)                           |
| 65-69 years     | 23               | 50%                  | 12                                         | 1.95%                                           | 591                                         | 564,123                              | 0.10% (NA - NA)                           |
| 70-79 years     | 98               | 50%                  | 49                                         | 3.86%                                           | 1,269                                       | 523,291                              | 0.24% (NA - NA)                           |
| 80+ years       | 131              | 66%                  | 45                                         | 20.38%                                          | 219                                         | 275,081                              | 0.08% (NA - NA)                           |
| <b>October</b>  |                  |                      |                                            |                                                 |                                             |                                      |                                           |
| 20-29 years     | 64               | 1%                   | 63                                         | 0.12%                                           | 54,533                                      | 2,233,707                            | 2.44% (1.70% - 3.51%)                     |
| 30-39 years     | 102              | 1%                   | 101                                        | 0.35%                                           | 28,606                                      | 2,171,853                            | 1.32% (0.88% - 1.88%)                     |
| 40-49 years     | 112              | 1%                   | 111                                        | 0.39%                                           | 28,725                                      | 2,157,398                            | 1.33% (0.96% - 1.82%)                     |
| 50-59 years     | 293              | 1%                   | 290                                        | 0.68%                                           | 42,942                                      | 2,440,051                            | 1.76% (1.30% - 2.37%)                     |
| 60-64 years     | 251              | 8%                   | 231                                        | 1.95%                                           | 11,870                                      | 639,365                              | 1.86% (1.35% - 2.59%)                     |
| 65-69 years     | 402              | 8%                   | 370                                        | 1.95%                                           | 19,011                                      | 564,123                              | 3.37% (2.44% - 4.69%)                     |
| 70-79 years     | 1242             | 8%                   | 1,143                                      | 3.86%                                           | 29,602                                      | 523,291                              | 5.66% (3.88% - 8.67%)                     |
| 80+ years       | 1504             | 14%                  | 1,293                                      | 20.38%                                          | 6,346                                       | 275,081                              | 2.31% (1.08% - 5.50%)                     |
| <b>November</b> |                  |                      |                                            |                                                 |                                             |                                      |                                           |
| 20-29 years     | 28               | 3%                   | 27                                         | 0.12%                                           | 23,376                                      | 2,233,707                            | 1.05% (0.73% - 1.50%)                     |
| 30-39 years     | 52               | 3%                   | 50                                         | 0.35%                                           | 14,289                                      | 2,171,853                            | 0.66% (0.44% - 0.94%)                     |
| 40-49 years     | 60               | 7%                   | 56                                         | 0.39%                                           | 14,456                                      | 2,157,398                            | 0.67% (0.49% - 0.93%)                     |
| 50-59 years     | 131              | 7%                   | 122                                        | 0.68%                                           | 18,036                                      | 2,440,051                            | 0.74% (0.55% - 1.01%)                     |
| 60-64 years     | 115              | 32%                  | 78                                         | 1.95%                                           | 4,020                                       | 639,365                              | 0.63% (0.48% - 0.92%)                     |
| 65-69 years     | 185              | 32%                  | 126                                        | 1.95%                                           | 6,466                                       | 564,123                              | 1.15% (0.86% - 1.66%)                     |
| 70-79 years     | 525              | 32%                  | 357                                        | 3.86%                                           | 9,249                                       | 523,291                              | 1.77% (1.27% - 2.84%)                     |
| 80+ years       | 610              | 37%                  | 384                                        | 20.38%                                          | 1,886                                       | 275,081                              | 0.69% (0.32% - 1.64%)                     |
| <b>December</b> |                  |                      |                                            |                                                 |                                             |                                      |                                           |
| 20-29 years     | 42               | 8%                   | 39                                         | 0.12%                                           | 33,257                                      | 2,233,707                            | 1.49% (1.03% - 2.14%)                     |
| 30-39 years     | 82               | 8%                   | 75                                         | 0.35%                                           | 21,371                                      | 2,171,853                            | 0.98% (0.65% - 1.39%)                     |
| 40-49 years     | 92               | 14%                  | 79                                         | 0.39%                                           | 20,497                                      | 2,157,398                            | 0.95% (0.68% - 1.30%)                     |
| 50-59 years     | 220              | 14%                  | 189                                        | 0.68%                                           | 28,009                                      | 2,440,051                            | 1.15% (0.85% - 1.55%)                     |
| 60-64 years     | 208              | 42%                  | 121                                        | 1.95%                                           | 6,201                                       | 639,365                              | 0.97% (0.73% - 1.40%)                     |
| 65-69 years     | 263              | 42%                  | 153                                        | 1.95%                                           | 7,841                                       | 564,123                              | 1.39% (1.05% - 2.01%)                     |
| 70-79 years     | 828              | 42%                  | 480                                        | 3.86%                                           | 12,441                                      | 523,291                              | 2.38% (1.70% - 3.79%)                     |
| 80+ years       | 1083             | 47%                  | 574                                        | 20.38%                                          | 2,816                                       | 275,081                              | 1.02% (0.48% - 2.46%)                     |

<sup>1</sup>The vaccinated population is excluded from this analysis

<sup>2</sup>Between brackets are the low and high values used in the scenarios, based on a bootstrapped credible interval (2.5th and 97.5th percentile)

### **Calculation risk of Myocarditis after infection**

A recent comprehensive study by the European Medicines Agency (EMA) estimated age-stratified incidence rates for myocarditis and pericarditis over the study period 2017-2019<sup>7</sup>. The background data presents the myocarditis/pericarditis incidence of the unvaccinated in the Netherlands:

| Age-group (years) | Incidence myocarditis/pericarditis |        |
|-------------------|------------------------------------|--------|
|                   | Female                             | Male   |
| 20-29             | 0.006%                             | 0.036% |
| 30-39             | 0.041%                             | 0.055% |
| 40-49             | 0.024%                             | 0.045% |
| 50-59             | 0.021%                             | 0.041% |
| 60-69             | 0.028%                             | 0.046% |
| 70-79             | 0.012%                             | 0.037% |
| 80+               | 0.050%                             | 0.046% |

These data was used with the HR of 5.16 from a meta-analysis to assess the risk of myocarditis in post- COVID-19 individuals<sup>8</sup>. The risk difference, or the excess risk of infection-induced myocarditis, was estimated as follows:

| Age-group (years) | Incidence risk of myocarditis/pericarditis |        | Excess risk of infection-induced myocarditis |        |
|-------------------|--------------------------------------------|--------|----------------------------------------------|--------|
|                   | Female                                     | Male   | Female                                       | Male   |
| 20-29             | 0.031%                                     | 0.185% | 0.025%                                       | 0.149% |
| 30-39             | 0.211%                                     | 0.285% | 0.170%                                       | 0.229% |
| 40-49             | 0.126%                                     | 0.233% | 0.102%                                       | 0.188% |
| 50-59             | 0.106%                                     | 0.210% | 0.086%                                       | 0.169% |
| 60-69             | 0.144%                                     | 0.239% | 0.116%                                       | 0.192% |
| 70-79             | 0.060%                                     | 0.192% | 0.049%                                       | 0.155% |
| 80+               | 0.257%                                     | 0.238% | 0.207%                                       | 0.192% |

For scenario analysis, data from Boehmer et al. was used, a cohort study from the Centers for Diseases Control and Prevention (CDC) on patients with at least one hospital-based encounter during March 2020 to Januari 2021<sup>9</sup>. Data was presented per age-group. The risk of the patients with COVID-19 was compared with the risk of patients without COVID, to estimate the adjusted myocarditis risk difference, by age, of myocarditis in infected individuals. However, age-groups in the model did not align with the age-groups in Boehmer et al., therefore, an average of the two adjacent age-groups was used:

| <b>Excess risk of infection-induced myocarditis</b> |        |
|-----------------------------------------------------|--------|
| 18-29 years                                         | 0.080% |
| 30-39 years                                         | 0.067% |
| 40-49 years                                         | 0.093% |
| 50-59 years                                         | 0.137% |
| 60-64 years                                         | 0.137% |
| 65-69 years                                         | 0.160% |
| 70-79 years                                         | 0.181% |
| 80+ years                                           | 0.208% |

### ***Risk of Myocarditis after COVID-19 vaccination***

The incidence rate of vaccine-induced myocarditis/pericarditis (per dose) in individuals age 18-39 years was estimated from a self-controlled case series analysis was undertaken on hospital admissions for myocarditis or pericarditis in England from February 2021 to February 2022<sup>10</sup>. The study focused on individuals eligible to receive the mRNA vaccines (BNT162b2 or mRNA-1273) for boosting. The attributable risk for an admission for myocarditis 0 to 6 days post vaccine was 2.5 (95% confidence interval [CI], 2.0-2.8) and 4.5 (95%CI, 3.9-4.8) per million vaccinations of the BNT162b2 booster and mRNA-1273 booster vaccine, respectively<sup>10</sup>.

### ***Length of stay, costs and QALY losses of myocarditis/pericarditis***

For the days of time loss of myocarditis/pericarditis after COVID-19 infection and vaccination, the length of stay from Dutch Statistics is used<sup>11</sup>. These days are used to estimate both the costs and QALYs lost. Costs per hospital day were obtained from the Dutch Costing Manual (€476/day, in 2014) and a QALY loss of 0.7 was assumed (per day=0.7/365)<sup>12,13</sup>:

|             | <b>Days of time loss</b> | <b>Costs per event (€)</b> | <b>QALYs lost</b> |
|-------------|--------------------------|----------------------------|-------------------|
| 18-29 years | 4.90                     | 2,849                      | 0.0094            |
| 30-39 years | 5.30                     | 3,081                      | 0.0102            |
| 40-49 years | 5.30                     | 3,082                      | 0.0102            |
| 50-59 years | 7.80                     | 4,536                      | 0.0150            |
| 60-64 years | 10.30                    | 5,989                      | 0.0198            |
| 65-69 years | 10.30                    | 5,989                      | 0.0198            |
| 70-79 years | 10.40                    | 6,048                      | 0.0199            |
| 80+ years   | 10.40                    | 6,048                      | 0.0199            |

### ***Input for calculation indirect effects***

|                                         |   |
|-----------------------------------------|---|
| <b>Productivity loss</b>                |   |
| Percentage in labor force <sup>14</sup> | % |
| Age group                               |   |
| 0-17 years                              |   |

|             |       |
|-------------|-------|
| 18-29 years | 83.6% |
| 30-39 years | 87.8% |
| 40-49 years | 87.1% |
| 50-59 years | 83.0% |
| 60-64 years | 64.6% |
| 65-69 years | 23.0% |
| 70-79 years | 4.4%  |
| 80+ years   | 0.0%  |

# Results

## CE plane

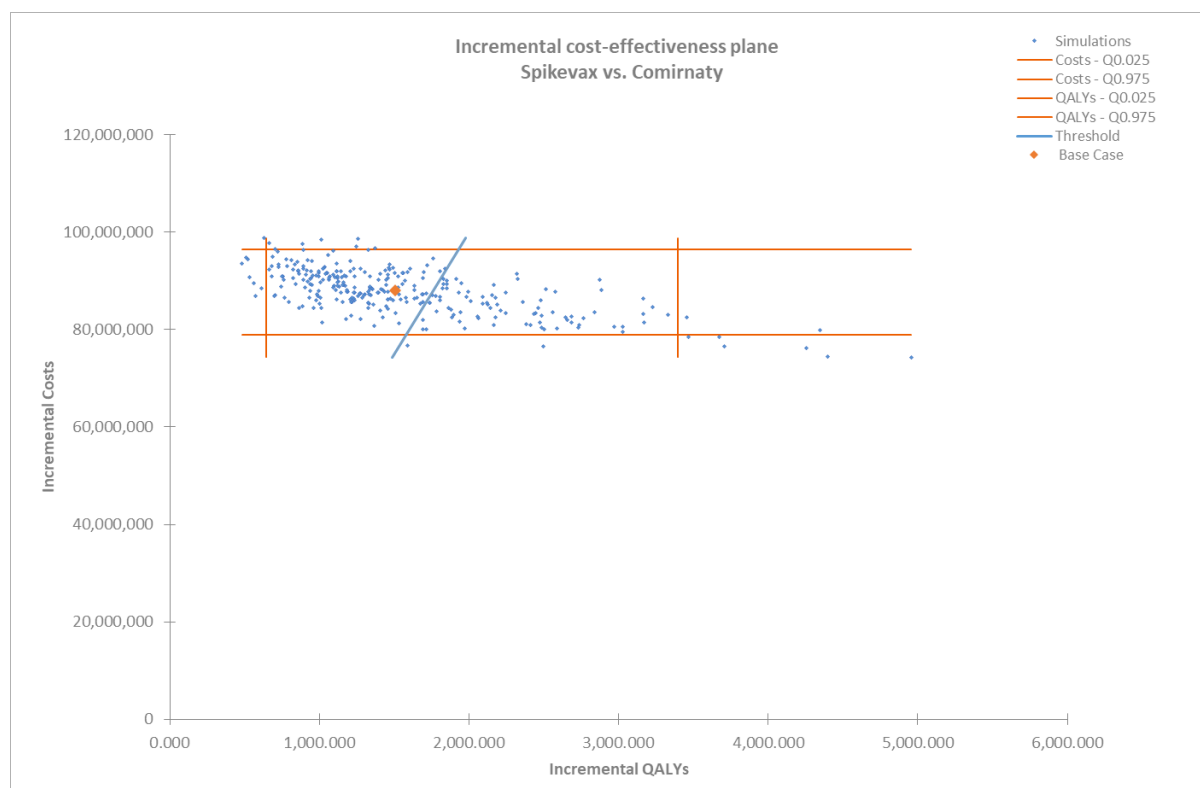

## References

1. de Boer PT, van de Kasstelee J, Vos ERA, et al. Age-specific severity of severe acute respiratory syndrome coronavirus 2 in February 2020 to June 2021 in the Netherlands. *Influenza Other Respir Viruses*. 2023;17(8):e13174. doi:10.1111/irv.13174
2. Bast E, Tang F, Dahn J, Palacio A. Increased risk of hospitalisation and death with the delta variant in the USA. *Lancet Infect Dis*. 2021;21(12):1629-1630. doi:10.1016/S1473-3099(21)00685-X
3. Nyberg T, Ferguson NM, Nash SG, et al. Comparative analysis of the risks of hospitalisation and death associated with SARS-CoV-2 omicron (B.1.1.529) and delta (B.1.617.2) variants in England: a cohort study. *The Lancet*. 2022;399(10332):1303-1312. doi:10.1016/S0140-6736(22)00462-7
4. COVID-19 dataset. Accessed July 20, 2023. <https://data.rivm.nl/covid-19/>
5. RIVM. *COVID-19 ziekenhuis en intensive-care-opnames per vaccinatiestatus in Nederland (opnames 3 oktober 2022 – 29 mei 2023)*.; 2023. Accessed August 4, 2023. <https://www.rivm.nl/documenten/covid-19-ziekenhuis-en-intensive-care-opnames-per-vaccinatiestatus-in-nederland-10>



6. Centraal Bureau voor de Statistiek. Bevolking op 1 januari en gemiddeld; geslacht, leeftijd en regio. Centraal Bureau voor de Statistiek. Published May 30, 2022. Accessed April 4, 2023. <https://www.cbs.nl/nl-nl/cijfers/detail/03759ned?dl=39E0B>
7. Willame C, Dodd C, Durán C, et al. Background rates of 41 adverse events of special interest for COVID-19 vaccines in 10 European healthcare databases - an ACCESS cohort study. *Vaccine*. 2023;41(1):251-262. doi:10.1016/j.vaccine.2022.11.031
8. Zuin M, Rigatelli G, Bilato C, et al. One-Year Risk of Myocarditis After COVID-19 Infection: A Systematic Review and Meta-analysis. *Can J Cardiol*. 2023;39(6):839-844. doi:10.1016/j.cjca.2022.12.003
9. Boehmer TK, Kompaniyets L, Lavery AM, et al. Association Between COVID-19 and Myocarditis Using Hospital-Based Administrative Data — United States, March 2020–January 2021. *Morb Mortal Wkly Rep*. 2021;70(35):1228. doi:10.15585/mmwr.mm7035e5
10. Stowe J, Miller E, Andrews N, Whitaker HJ. Risk of myocarditis and pericarditis after a COVID-19 mRNA vaccine booster and after COVID-19 in those with and without prior SARS-CoV-2 infection: A self-controlled case series analysis in England. *PLOS Med*. 2023;20(6):e1004245. doi:10.1371/journal.pmed.1004245
11. StatLine - Ziekenhuisopnamen en -patiënten; diagnose-indeling ICD-10 (3-teken niveau). Accessed November 27, 2023. <https://opendata.cbs.nl/#/CBS/nl/dataset/84069NED/table>
12. Prosser LA, Harpaz R, Rose AM, et al. A Cost-Effectiveness Analysis of Vaccination for Prevention of Herpes Zoster and Related Complications: Input for National Recommendations. *Ann Intern Med*. 2019;170(6):380-388. doi:10.7326/M18-2347
13. Ministerie van Volksgezondheid W en S. Richtlijn voor het uitvoeren van economische evaluaties in de gezondheidszorg - Publicatie - Zorginstituut Nederland. Published February 29, 2016. Accessed June 20, 2023. <https://www.zorginstituutnederland.nl/publicaties/publicatie/2016/02/29/richtlijn-voor-het-uitvoeren-van-economische-evaluaties-in-de-gezondheidszorg>
14. StatLine - Werkzame beroepsbevolking; arbeidsduur, 2003-2022. Accessed November 22, 2023. <https://opendata.cbs.nl/#/CBS/nl/dataset/82647NED/table>
